# Supplementary material for: Understanding the Interplay between COX-2 and hTERT in Colorectal Cancer Using a Multi-Omics Analysis
Source: MDPI journal article supplement (doi:10.3390/cancers11101536), 2019-10-11
Supplement: s1 [file s1]

# Understanding the Interplay between COX-2 and hTERT in Colorectal Cancer Using a Multi-Omics Analysis

Georgios D. Ayiomamitis, George Notas, Thivi Vasilakaki, Aikaterini Tsavari, Styliani Vederaki, Theodosios Theodosopoulos, Elias Kouroumalis and Apostolos Zaravinos

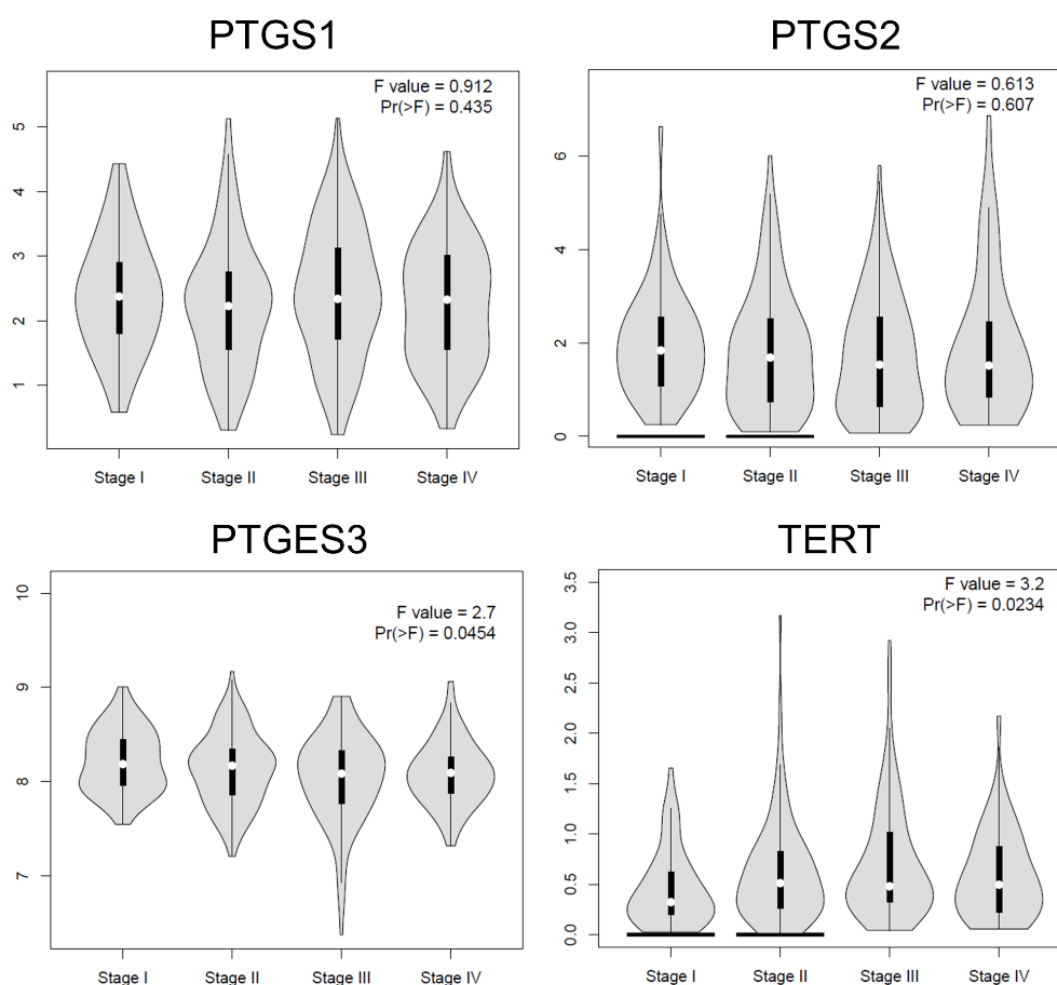

**Figure S1.** PTGS1 or PTGS2 expression levels did not differ with regard to tumor staging ( $p > 0.05$ ), but PTGS3 expression was lower, and TERT expression was higher in high stage tumors (III and IV), compared to low-stage tumors (I and II).

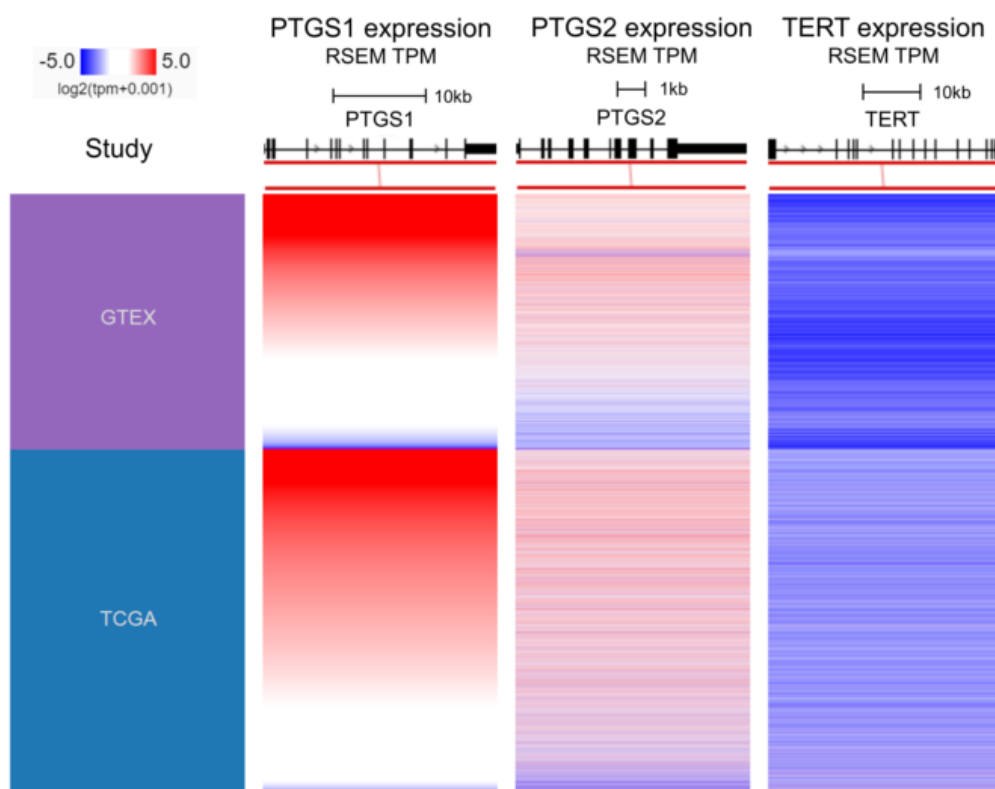

**Figure S2.** Heatmap depicting the PTGS1, PTGS2 and TERT expression levels (log<sub>2</sub>(TPM + 0.001)) in the TCGA-COAD and GTEx projects.

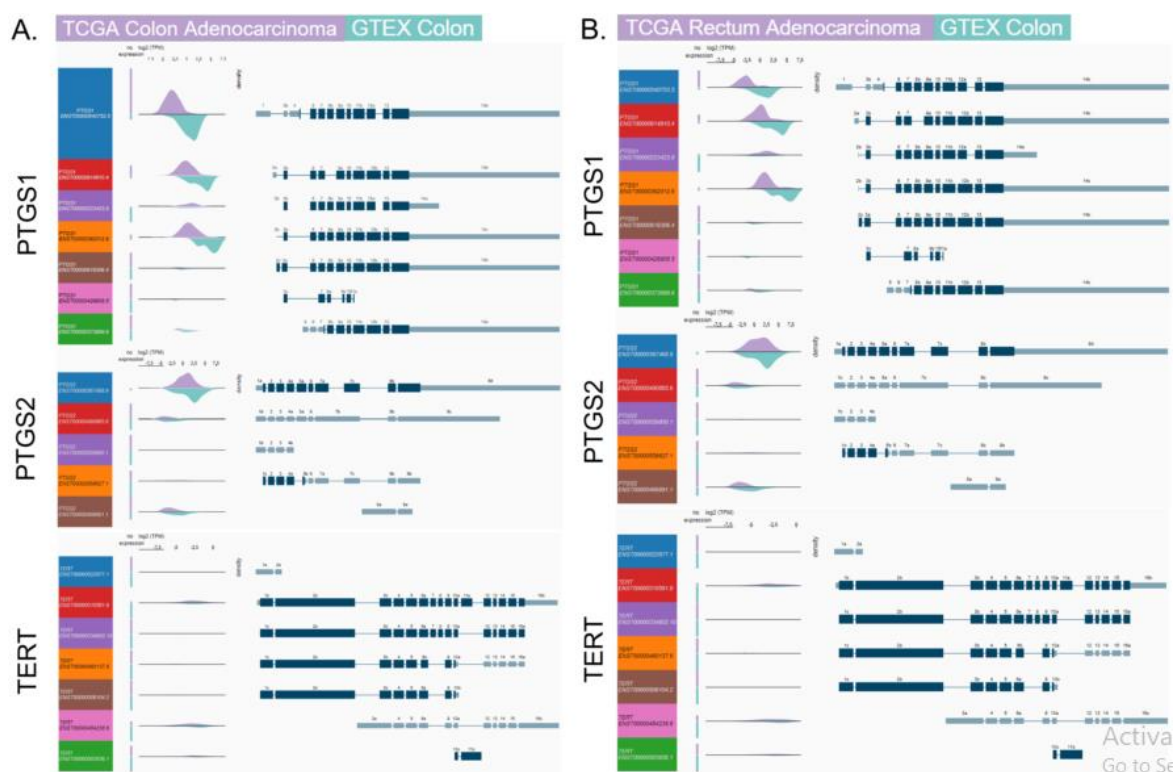

**Figure S3.** Transcript analysis of PTGS1, PTGS2 and TERT in colorectal cancer (TCGA-Colon/Rectum Adenocarcinoma) vs. the normal colon (GTEx Colon). Expression values of each gene's transcript appear in log<sub>2</sub>TPM values.
